# Supplementary material for: In triple negative breast tumor cells, PLC-β2 promotes the conversion of CD133high to CD133low phenotype and reduces the CD133-related invasiveness
Source: PubMed Central journal article supplement (PMC3866498; doi:10.1186/1476-4598-12-165), 2013-12-13
Supplement: 1476-4598-12-165-S1.pdf [file 1476-4598-12-165-S1.pdf]

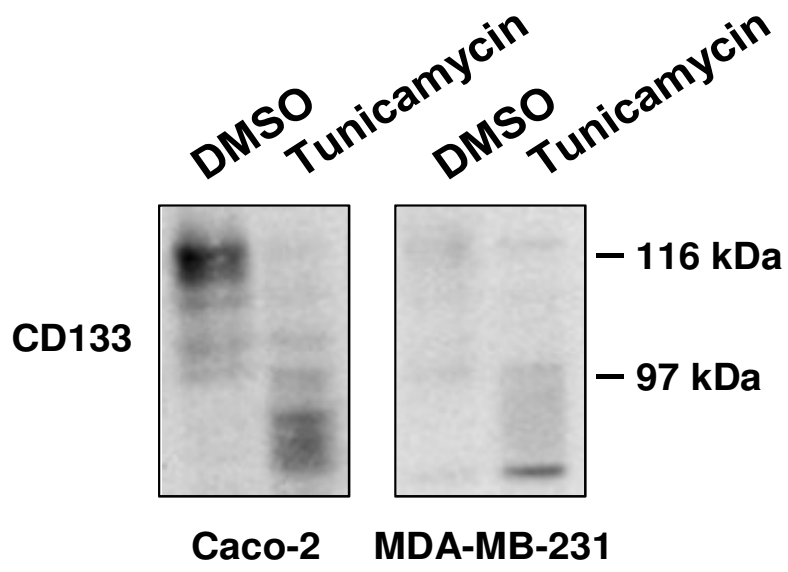

**SupplementaryFIGURE 1**
